# Supplementary material for: In Vitro Activity of New β-Lactamase Inhibitor Combinations against blaNDM, blaKPC, and ESBL-Producing Enterobacteriales Uropathogens
Source: MDPI journal article supplement (doi:10.3390/antibiotics12101481), 2023-09-25
Supplement: s1 [file s1]

**Table S1. Details of primers, amplicon size and annealing temperature of the primers used for the genotypic detection of ESBLs and carbapenemase genes**

| Genes                         | Sequence (5to 3)                                      | Amplicon size<br>bp | Temp.<br>°C | Reference |
|-------------------------------|-------------------------------------------------------|---------------------|-------------|-----------|
| <i>bla</i> <sub>TEM</sub>     | F: TCGGGGAAATGTGCG<br>R: TGCTTAATCAGTGAGGCACC         | 971                 | 59.2        | [21]      |
| <i>bla</i> <sub>SHV</sub>     | F: GCCGGGTTATTCTTATTTGTCGC<br>R: ATGCCGCCGCCAGTCA     | 1,007               | 62          | [21]      |
| <i>bla</i> <sub>CTX-M-4</sub> | F: TTAATGATGACTCAGAGCATTC<br>R: GATACCTCGCTCCATTTATTG | 901                 | 55.4        | [22]      |
| <i>bla</i> <sub>NDM</sub>     | F: CACCTCATGTTTGAATTCGCC<br>R: CTCTGTCACATCGAAATCGC   | 984                 | 64          | [28]      |
| <i>bla</i> <sub>KPC</sub>     | F: CTTGTCTCTCATGGCCGCTGG<br>R: ACGGAACGTGGTATCGCCGAT  | 449                 | 55          | [45]      |
| <i>bla</i> <sub>OXA-48</sub>  | F: GCTTGATCGCCCTCGATT<br>R: GATTTGCTCCGTGGCCGAAA      | 281                 | 60          | [46]      |
| <i>bla</i> <sub>IMP</sub>     | F: GGAATAGAGTGGCTTAATTC<br>R: CAACCAGTTTTGCCTTACC     | 327                 | 52          | [28]      |
| <i>bla</i> <sub>VIM</sub>     | F: GGTGTTTGGTCGCATATCGC<br>R: CCATTCAGCCAGATCGGCATC   | 503                 | 58          | [28]      |

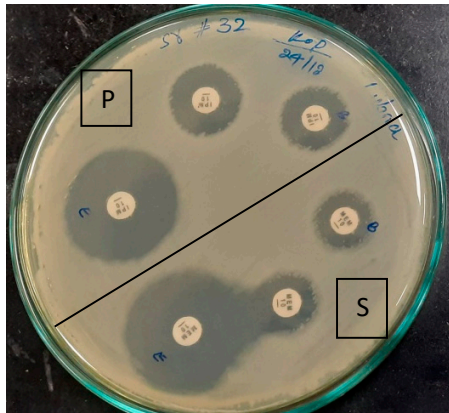

Fig S1. Phenotypic detection of MBL and KPC P: positive control, S: tested isolate

E: EDTA, B: phenylboronic acid (PBA). Both isolates were positive for MBL and negative for KPC.

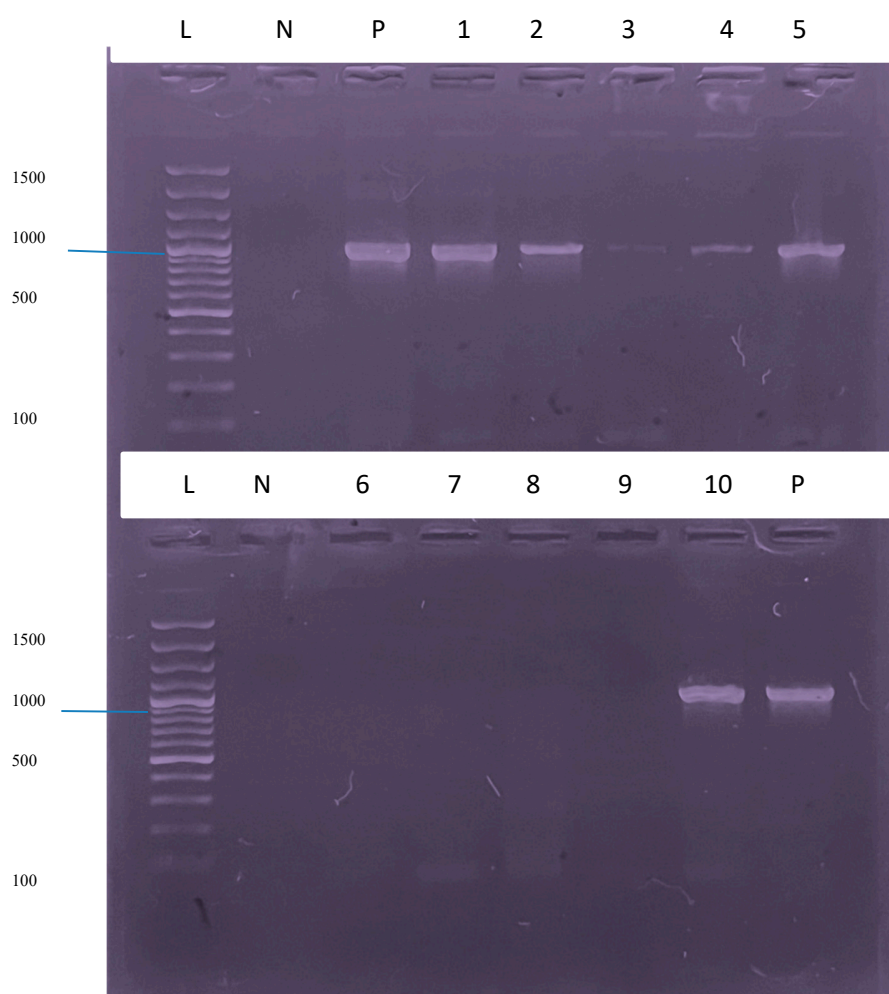

Fig S2. *bla*<sub>NDM</sub> amplicon (984bp). L: ladder, N: negative control, P: positive control.

The samples # 1,2,3,4,5 and 10 were positive for *bla*<sub>NDM</sub>. Sample # 3 display a weak band, sample was repeated and were positive.

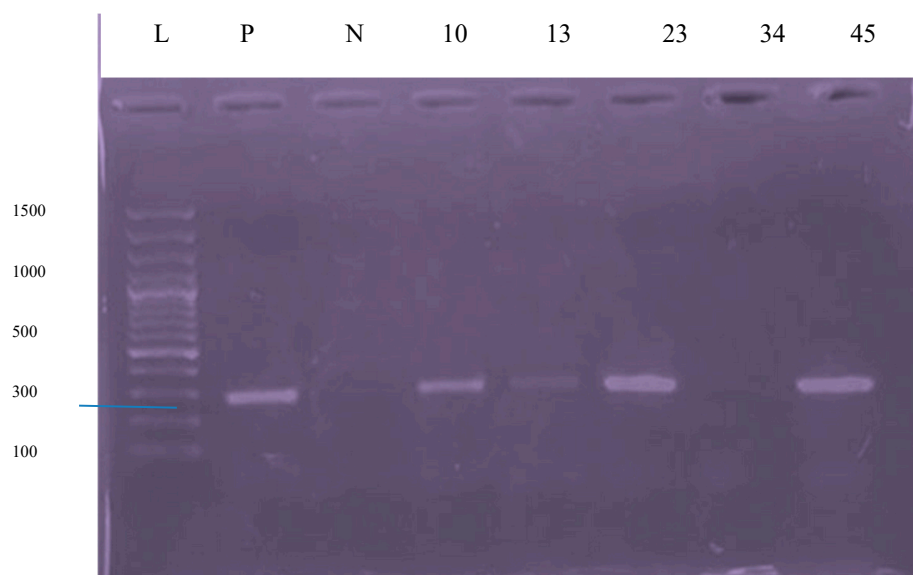

Fig S3. *bla*<sub>OXA-48</sub> amplicon (281bp). L: ladder, N: negative control, P: positive control.

The samples # 10, 13, 23, and 45 were positive for *bla*<sub>OXA-48</sub>.
